# Supplementary material for: Anomalous spectral shift of localized surface plasmon resonance
Source: Royal Society of Chemistry journal article supplement (doi:10.1039/d3na01131c), 2024-01-01
Supplement: d3na01131c1.pdf [file d3na01131c1.pdf]

## Supporting Information

### **Anomalous Spectral Shift of Localized Surface Plasmon Resonance**

*Authors: Saikiran Kosame<sup>1</sup> Mukkath Joseph Josline<sup>2,3</sup>, Jae-Hyun Lee<sup>2,3</sup> and Heongkyu Ju<sup>1\*</sup>*

<sup>1</sup>Department of Physics, Gachon University, Seongnam-si 13120, Republic of Korea

<sup>2</sup>Department of Materials Science and Engineering, Ajou University, Suwon 16499, Korea

<sup>3</sup>Department of Energy Systems Research, Ajou University, Suwon 16499, Korea

\*Corresponding author: batu@gachon.ac.kr

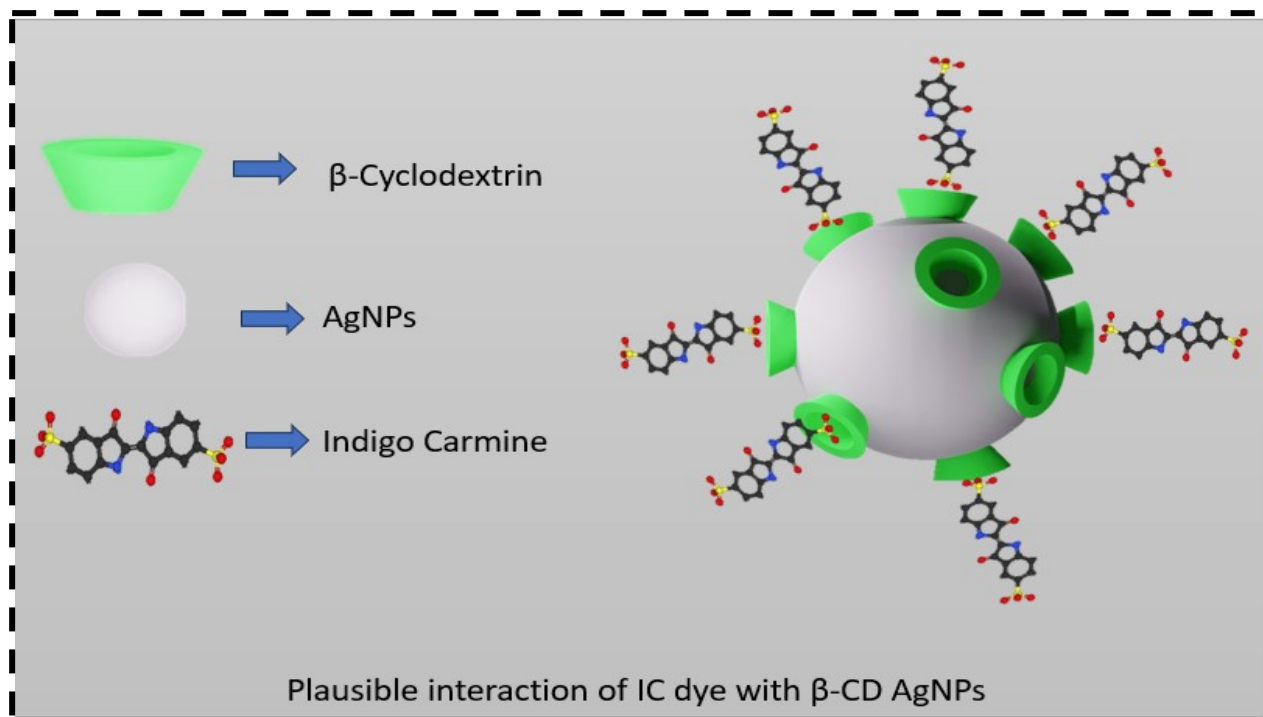

**Figure S1.** Plausible interaction of IC dye with  $\beta$ -CD capped AgNPs

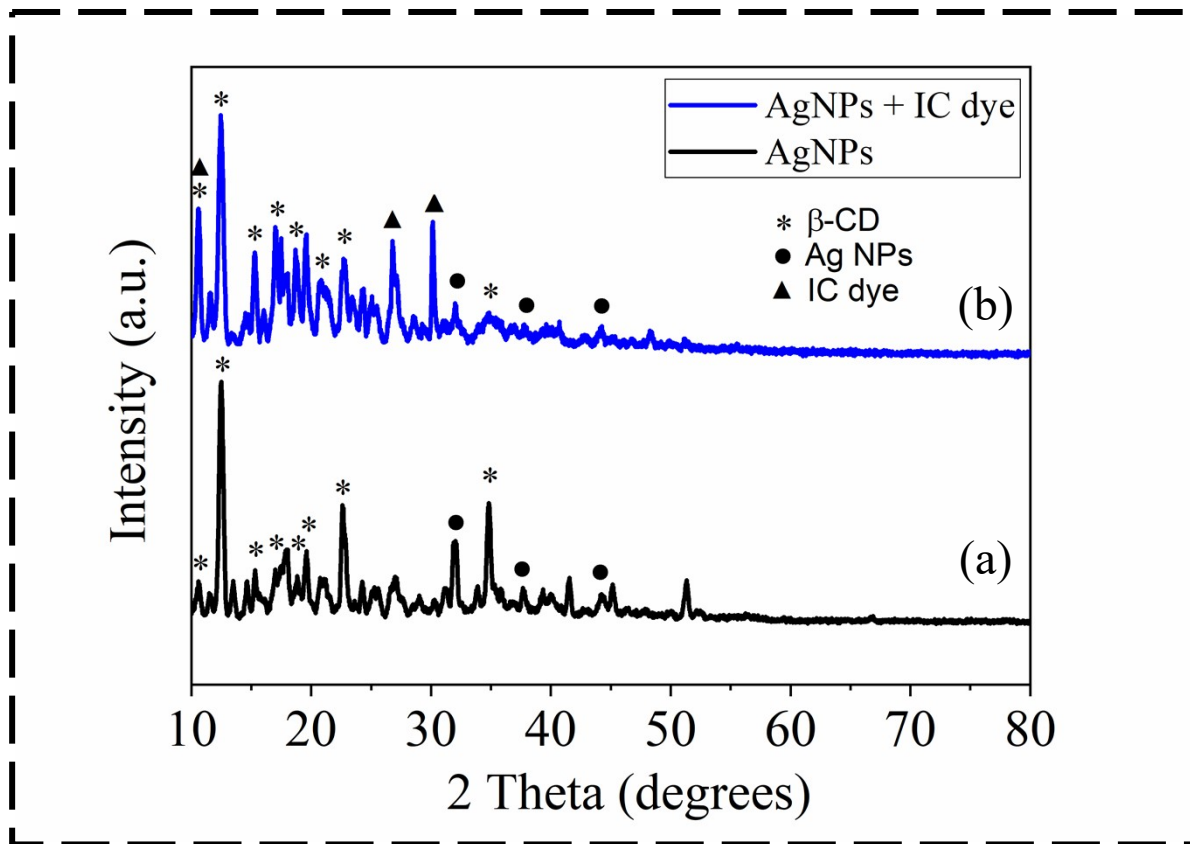

**Figure S2.** XRD analysis of (a) AgNPs (b) AgNPs post addition of IC dye

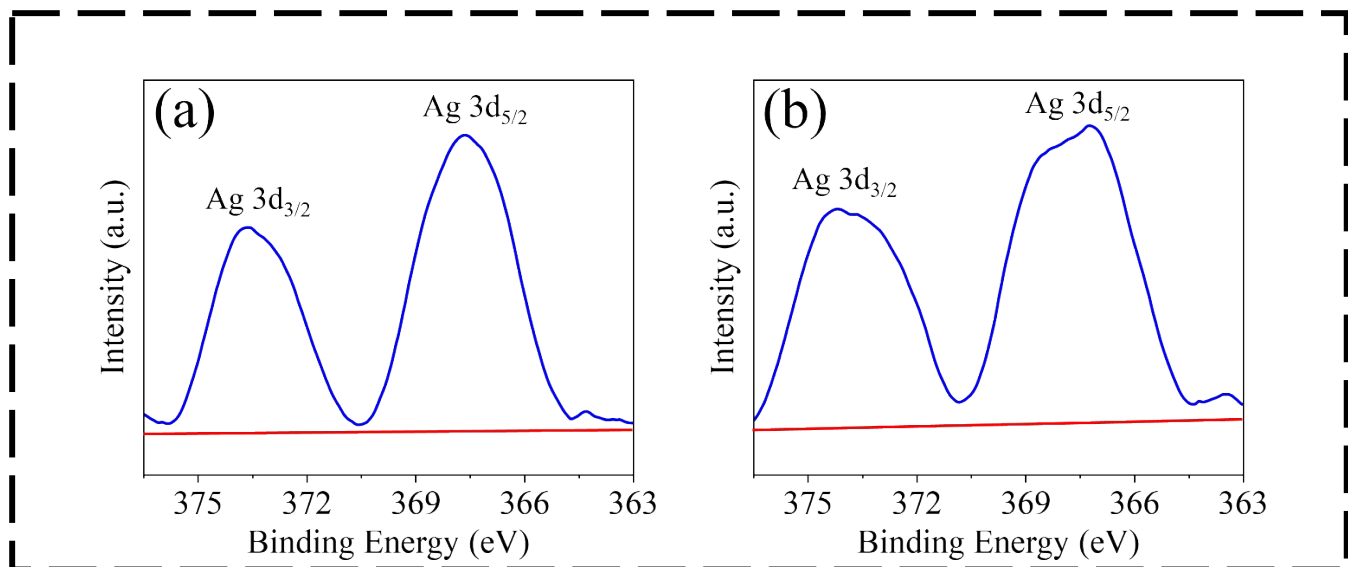

**Figure S3.** XPS high-resolution spectrum of (a) AgNPs (b)AgNPs post addition of IC dye.

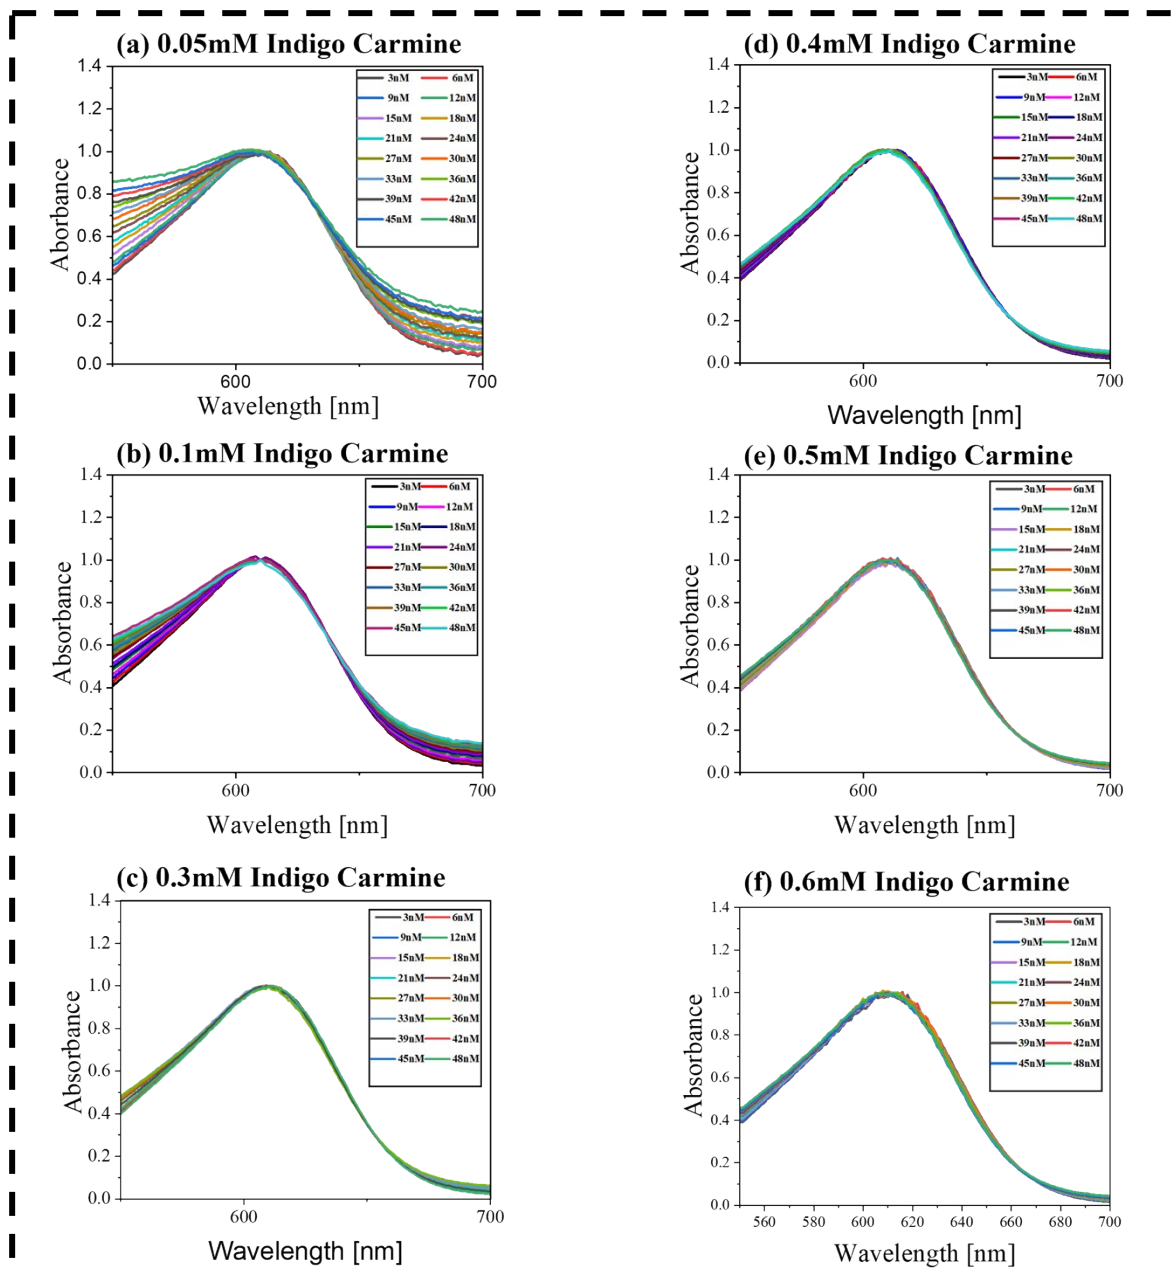

**Figure S4.** The normalized absorbance spectra of colloidal AgNPs where IC solution was used as colloidal solvent. For IC concentration of 0.05 mM (a), 0.1 mM (b), 0.3 mM (c), 0.4 mM (d), 0.5 mM (e), and 0.6 mM (f), AgNPs concentration was varied.
